# Supplementary material
Source: MDPI journal article supplement (https://www.mdpi.com/2073-4395/13/6/1529)
Supplement: s1 [file s1]

**Table S1.** Annual values of meteorological parameters in the vegetation period of winter wheat (October–June) during the long-term field experiment (1995/96–2019/20). Meteorological station Rimski šančevi ( $\varphi$  45°20' N,  $\lambda$  19°51' E, altitude 84 m).

| Year           | T <sub>mean</sub> | T <sub>max</sub> | aT <sub>max</sub> | T <sub>min</sub> | aT <sub>min</sub> | Dtr         | Etr         | FD         | SF        | ID        | WD        | TD        | P          | P01        | IP         | P1        | P10       | $\Sigma T_{ef}$ |
|----------------|-------------------|------------------|-------------------|------------------|-------------------|-------------|-------------|------------|-----------|-----------|-----------|-----------|------------|------------|------------|-----------|-----------|-----------------|
| 1995/1996      | 7.4               | 12.0             | 33.2              | 3.0              | -15.6             | 9.0         | 48.8        | 113        | 7         | 26        | 33        | 10        | 409        | 107        | 3.8        | 66        | 9         | 1369            |
| 1996/1997      | 8.2               | 13.1             | 33.0              | 3.5              | -24.0             | 9.6         | 57.0        | 95         | 8         | 20        | 35        | 9         | 471        | 107        | 4.4        | 73        | 13        | 1398            |
| 1997/1998      | 9.0               | 14.3             | 33.3              | 4.4              | -8.4              | 9.9         | 41.7        | 73         | 0         | 10        | 35        | 11        | 507        | 85         | 6.0        | 53        | 17        | 1440            |
| 1998/1999      | 8.2               | 13.0             | 31.4              | 3.9              | -19.3             | 9.1         | 50.7        | 91         | 11        | 30        | 31        | 5         | 503        | 111        | 4.5        | 72        | 20        | 1456            |
| 1999/2000      | 9.0               | 14.3             | 36.9              | 4.1              | -19.5             | 10.2        | 56.4        | 93         | 11        | 24        | 54        | 16        | 447        | 84         | 5.3        | 58        | 15        | 1593            |
| 2000/2001      | 10.2              | 16.0             | 32.0              | 5.4              | -11.2             | 10.6        | 43.2        | 57         | 2         | 3         | 37        | 5         | 699        | 103        | 6.8        | 72        | 22        | 1666            |
| 2001/2002      | 9.1               | 14.6             | 37.6              | 4.3              | -19.1             | 10.2        | 56.7        | 85         | 11        | 24        | 44        | 12        | 302        | 82         | 3.7        | 47        | 10        | 1630            |
| 2002/2003      | 8.7               | 13.9             | 36.3              | 3.6              | -25.0             | 10.4        | 61.3        | 97         | 19        | 39        | 56        | 29        | 298        | 92         | 3.2        | 59        | 8         | 1717            |
| 2003/2004      | 8.2               | 12.9             | 30.5              | 4.1              | -18.3             | 8.9         | 48.8        | 70         | 8         | 16        | 26        | 1         | 611        | 119        | 5.1        | 81        | 19        | 1349            |
| 2004/2005      | 8.0               | 12.8             | 32.4              | 3.5              | -24.2             | 9.2         | 56.6        | 93         | 13        | 24        | 30        | 7         | 582        | 100        | 5.8        | 64        | 13        | 1464            |
| 2005/2006      | 8.2               | 12.8             | 34.5              | 3.9              | -13.8             | 8.9         | 48.3        | 86         | 7         | 16        | 23        | 13        | 480        | 109        | 4.4        | 76        | 15        | 1401            |
| 2006/2007      | 11.0              | 16.7             | 36.0              | 5.8              | -6.3              | 10.9        | 42.3        | 43         | 0         | 1         | 50        | 10        | 422        | 91         | 4.6        | 47        | 14        | 1802            |
| 2007/2008      | 9.1               | 14.0             | 34.0              | 4.7              | -12.1             | 9.4         | 46.1        | 73         | 3         | 20        | 40        | 11        | 514        | 112        | 4.6        | 65        | 17        | 1534            |
| 2008/2009      | 9.5               | 14.6             | 32.4              | 5.0              | -15.9             | 9.6         | 48.3        | 63         | 6         | 20        | 36        | 9         | 423        | 116        | 3.6        | 67        | 12        | 1652            |
| 2009/2010      | 9.0               | 13.4             | 34.0              | 5.0              | -21.2             | 8.4         | 55.2        | 67         | 8         | 17        | 33        | 7         | 772        | 141        | 5.5        | 98        | 25        | 1564            |
| 2010/2011      | 8.5               | 13.5             | 33.7              | 4.1              | -13.4             | 9.4         | 47.1        | 78         | 13        | 33        | 34        | 4         | 388        | 96         | 4.0        | 66        | 14        | 1524            |
| 2011/2012      | 8.5               | 13.8             | 36.0              | 3.6              | -28.7             | 10.3        | 64.7        | 98         | 16        | 20        | 47        | 17        | 363        | 98         | 3.7        | 63        | 7         | 1557            |
| 2012/2013      | 9.4               | 14.3             | 34.8              | 5.2              | -13.9             | 9.1         | 48.7        | 65         | 4         | 11        | 42        | 11        | 603        | 132        | 4.6        | 91        | 17        | 1576            |
| 2013/2014      | 10.4              | 15.7             | 33.6              | 5.7              | -13.4             | 10.0        | 47.0        | 55         | 2         | 7         | 31        | 6         | 483        | 87         | 5.6        | 54        | 12        | 1732            |
| 2014/2015      | 9.9               | 14.9             | 33.3              | 5.4              | -16.6             | 9.5         | 49.9        | 48         | 3         | 8         | 42        | 8         | 551        | 96         | 5.7        | 62        | 14        | 1602            |
| 2015/2016      | 10.2              | 15.2             | 34.8              | 5.7              | -11.0             | 9.5         | 45.8        | 48         | 1         | 8         | 42        | 7         | 603        | 110        | 5.5        | 69        | 24        | 1656            |
| 2016/2017      | 8.6               | 13.7             | 36.6              | 3.8              | -19.4             | 9.9         | 56.0        | 82         | 11        | 29        | 41        | 12        | 429        | 88         | 4.9        | 57        | 10        | 1576            |
| 2017/2018      | 10.4              | 15.6             | 34.1              | 5.9              | -20.3             | 9.6         | 54.4        | 57         | 2         | 7         | 62        | 14        | 594        | 113        | 5.3        | 75        | 18        | 1799            |
| 2018/2019      | 10.0              | 15.2             | 33.2              | 5.2              | -16.3             | 10.0        | 49.5        | 70         | 3         | 14        | 37        | 13        | 435        | 99         | 4.4        | 67        | 10        | 1714            |
| 2019/2020      | 10.4              | 16.1             | 34.4              | 5.5              | -6.6              | 10.6        | 41.0        | 51         | 0         | 5         | 40        | 5         | 477        | 93         | 5.1        | 63        | 15        | 1719            |
| <b>Average</b> | <b>9.2</b>        | <b>14.3</b>      | <b>34.1</b>       | <b>4.6</b>       | <b>-16.5</b>      | <b>9.7</b>  | <b>50.6</b> | <b>74</b>  | <b>7</b>  | <b>17</b> | <b>39</b> | <b>10</b> | <b>495</b> | <b>103</b> | <b>4.8</b> | <b>67</b> | <b>15</b> | <b>1579</b>     |
| <b>Max.</b>    | <b>11.0</b>       | <b>16.7</b>      | <b>37.6</b>       | <b>5.9</b>       | <b>-6.3</b>       | <b>10.9</b> | <b>64.7</b> | <b>113</b> | <b>19</b> | <b>39</b> | <b>62</b> | <b>29</b> | <b>772</b> | <b>141</b> | <b>6.8</b> | <b>98</b> | <b>25</b> | <b>1802</b>     |
| <b>Min.</b>    | <b>7.4</b>        | <b>12.0</b>      | <b>30.5</b>       | <b>3.0</b>       | <b>-28.7</b>      | <b>8.4</b>  | <b>41.0</b> | <b>43</b>  | <b>0</b>  | <b>1</b>  | <b>23</b> | <b>1</b>  | <b>298</b> | <b>82</b>  | <b>3.2</b> | <b>47</b> | <b>7</b>  | <b>1349</b>     |

T<sub>mean</sub> – Mean annual air temperature (°C), T<sub>max</sub> – Mean maximum annual air temperature (°C), aT<sub>max</sub> – Absolutely maximum annual air temperature (°C), T<sub>min</sub> – Mean minimum annual air temperature (°C), aT<sub>min</sub> – Absolutely minimum annual air temperature (°C), Dtr – Diurnal temperature range (T<sub>max</sub>-T<sub>min</sub>) (°C), Etr – Extreme temperature range (aT<sub>max</sub>-aT<sub>min</sub>), FD – Number of days with frost (T<sub>min</sub> < 0 °C), SF – Number of days with strong frost (T<sub>min</sub> ≤ -10 °C), ID – Number of icy days (T<sub>max</sub> < 0 °C), WD – Number of warm days (T<sub>max</sub> ≥ 25 °C), TD – Number of tropical (hot) days (T<sub>max</sub> ≥ 30 °C), P – Annual precipitation amount (mm), P01 – Number of days with precipitation (P ≥ 0.1 mm), IP – Annual intensity of precipitation (amount of precipitation / number of days with precipitation), P1 – Number of days with light rain (P ≥ 1 mm), P10 – Number of days with heavy rain (P ≥ 10 mm),  $\Sigma T_{ef}$  – The average annual sum of effective air temperatures (T<sub>base</sub> = 5 °C).

**Table S2.** Analyzed varieties, year of release, representation of wheat varieties in the trial, and number of tested varieties by year (1995/96–2019/20).

| Varieties included in the analysis *<br>(in the order of sowing in a 20-year period) |             |                   |                    | Varieties (in order of sowing in the 25-year period) in certain years |                                                                                                                                                |     |     |     |     |     |     |     |                     |
|--------------------------------------------------------------------------------------|-------------|-------------------|--------------------|-----------------------------------------------------------------------|------------------------------------------------------------------------------------------------------------------------------------------------|-----|-----|-----|-----|-----|-----|-----|---------------------|
| Designation                                                                          | Variety     | Year of release** | Years in the trial | Year                                                                  | Varieties                                                                                                                                      |     |     |     |     |     |     |     | Number of varieties |
| V1                                                                                   | Pobeda      | 1990              | 18                 | 1995/96                                                               | V1                                                                                                                                             | V5  | V3  | V6  | V2  | V7  | V4  | V12 | 8                   |
| V2                                                                                   | Sremica     | 1974              | 11                 | 1996/97                                                               | V1                                                                                                                                             | V5  | V3  | V6  | V2  | V7  | V4  | V12 | 8                   |
| V3                                                                                   | NS Rana 2   | 1975              | 10                 | 1997/98                                                               | V1                                                                                                                                             | V5  | V3  | V6  | V2  | V7  | V4  | V12 | 8                   |
| V4                                                                                   | Libellula   | 1965 (Italy)      | 10                 | 1998/99                                                               | NATO bombing of the FR Yugoslavia – the trial was not harvested.                                                                               |     |     |     |     |     |     |     | -                   |
| V5                                                                                   | Drina       | 1973              | 8                  | 1999/00                                                               | V1                                                                                                                                             | V5  | V3  | V6  | V2  | V7  | V4  | V12 | 8                   |
| V6                                                                                   | Jugoslavija | 1980              | 8                  | 2000/01                                                               | V1                                                                                                                                             | V5  | V3  | V6  | V2  | V7  | V4  | V8  | 8                   |
| V7                                                                                   | Lasta       | 1987              | 8                  | 2001/02                                                               | V1                                                                                                                                             | V5  | V3  | V6  | V2  | V7  | V4  | V8  | 8                   |
| V8                                                                                   | Sofija      | 1998              | 8                  | 2002/03                                                               | V1                                                                                                                                             | V5  | V3  | V6  | V2  | V7  | V4  | V8  | 8                   |
| V9                                                                                   | Simonida    | 2003              | 8                  | 2003/04                                                               | V1                                                                                                                                             | V5  | V3  | V6  | V2  | V7  | V4  | V8  | 8                   |
| V10                                                                                  | NS Ilina    | 2010              | 6                  | 2004/05                                                               | V1                                                                                                                                             | -   | -   | V2  | V8  | V18 | V14 | -   | 5                   |
| V11                                                                                  | NS Vljajna  | 2014              | 6                  | 2005/06                                                               | V1                                                                                                                                             | V19 | -   | V2  | V8  | V18 | V14 | V20 | 7                   |
| V12                                                                                  | Somborka    | 1986              | 4                  | 2006/07                                                               | V20                                                                                                                                            | V8  | V2  | V19 | V18 | -   | -   | V15 | 6                   |
| V13                                                                                  | NS Obala    | 2015              | 5                  | 2007/08                                                               | V20                                                                                                                                            | -   | V15 | -   | -   | -   | V8  | V19 | 4                   |
| V14                                                                                  | Balkan      | 1979              | 4                  | 2008/09                                                               | Facultative variety “Nataša” – sown as spring wheat (first half of March) on the entire trial. These three years are not included in analyses. |     |     |     |     |     |     |     | -                   |
| V15                                                                                  | NS 40S      | 2006              | 4                  | 2009/10                                                               |                                                                                                                                                |     |     |     |     |     |     |     | -                   |
| V16                                                                                  | NS Petrija  | 2013              | 4                  | 2010/11                                                               |                                                                                                                                                |     |     |     |     |     |     |     | -                   |
| V17                                                                                  | NS Epoha    | 2016              | 4                  | 2011/12                                                               | V9                                                                                                                                             | V3  | -   | V4  | -   | V15 | V1  | V14 | 6                   |
| V18                                                                                  | Pesma       | 1995              | 3                  | 2012/13                                                               | V15                                                                                                                                            | V4  | V1  | -   | V9  | V3  | V14 | -   | 6                   |
| V19                                                                                  | Ljiljana    | 2000              | 3                  | 2013/14                                                               | Strong appearance of <i>Puccinia striiformis</i> – the trial was not harvested.                                                                |     |     |     |     |     |     |     | -                   |
| V20                                                                                  | Dragana     | 2002              | 3                  | 2014/15                                                               | -                                                                                                                                              | -   | V10 | -   | V1  | V11 | V9  | -   | 4                   |
| Total:                                                                               | 20          | (1965–2016)       | 135                | 2015/16                                                               | V13                                                                                                                                            | V16 | V10 | -   | V1  | V11 | V9  | -   | 6                   |
|                                                                                      |             |                   |                    | 2016/17                                                               | V13                                                                                                                                            | V16 | V10 | V17 | V1  | V11 | V9  | -   | 7                   |
|                                                                                      |             |                   |                    | 2017/18                                                               | V13                                                                                                                                            | V16 | V10 | V17 | V1  | V11 | V9  | -   | 7                   |
|                                                                                      |             |                   |                    | 2018/19                                                               | V13                                                                                                                                            | V16 | V10 | V17 | V1  | V11 | V9  | -   | 7                   |
|                                                                                      |             |                   |                    | 2019/20                                                               | V13                                                                                                                                            | -   | V10 | V17 | V1  | V11 | V9  | -   | 6                   |
| Total:                                                                               |             |                   |                    |                                                                       |                                                                                                                                                |     |     |     |     |     |     |     | 135                 |

\* All varieties that were represented in the trial for at least three years (varieties that were sown for only 1 or 2 years were excluded from further analyses). \*\* Except from the old Italian variety "Libellula", the other 19 high-yielding varieties were released by the Institute of Field and Vegetable Crops, Novi Sad.

**Table S3.** The sequence of crop changes in crop rotation at the "ISDV" trial by years, during the research period (1995/96–2019/20).

| Year    | Experimental fields |                     |                     |
|---------|---------------------|---------------------|---------------------|
|         | I                   | II                  | III                 |
| 1995/96 | <b>Winter wheat</b> | Maize               | Soybean             |
| 1996/97 | Maize               | Soybean             | <b>Winter wheat</b> |
| 1997/98 | Soybean             | <b>Winter wheat</b> | Maize               |
| 1998/99 | <b>Winter wheat</b> | Maize               | Soybean             |
| 1999/00 | Maize               | Soybean             | <b>Winter wheat</b> |
| 2000/01 | Soybean             | <b>Winter wheat</b> | Maize               |
| 2001/02 | <b>Winter wheat</b> | Maize               | Soybean             |
| 2002/03 | Maize               | Soybean             | <b>Winter wheat</b> |
| 2003/04 | Soybean             | <b>Winter wheat</b> | Maize               |
| 2004/05 | <b>Winter wheat</b> | Maize               | Soybean             |
| 2005/06 | Maize               | Soybean             | <b>Winter wheat</b> |
| 2006/07 | Soybean             | <b>Winter wheat</b> | Maize               |
| 2007/08 | <b>Winter wheat</b> | Maize               | Soybean             |
| 2008/09 | Maize               | Soybean             | <b>Winter wheat</b> |
| 2009/10 | Soybean             | <b>Winter wheat</b> | Maize               |
| 2010/11 | <b>Winter wheat</b> | Maize               | Soybean             |
| 2011/12 | Maize               | Soybean             | <b>Winter wheat</b> |
| 2012/13 | Soybean             | <b>Winter wheat</b> | Maize               |
| 2013/14 | <b>Winter wheat</b> | Maize               | Soybean             |
| 2014/15 | Maize               | Soybean             | <b>Winter wheat</b> |
| 2015/16 | Soybean             | <b>Winter wheat</b> | Maize               |
| 2016/17 | <b>Winter wheat</b> | Maize               | Soybean             |
| 2017/18 | Maize               | Soybean             | <b>Winter wheat</b> |
| 2018/19 | Soybean             | <b>Winter wheat</b> | Maize               |
| 2019/20 | <b>Winter wheat</b> | Maize               | Soybean             |

**Table S4.** Analysis of variance for wheat grain yield under different years (Y), straw management and N-fertilization treatments (SN), and varieties (V).\*

| Source         | d.f. | SS        | SS (%) | MS      | F        | <i>p</i> |
|----------------|------|-----------|--------|---------|----------|----------|
| Model          | 1352 | 11329.529 | -      | 8.380   | 24.935   | <0.001   |
| Replicates     | 3    | 23.804    | 0.2    | 7.935   | 23.610   | <0.001   |
| Year (Y)       | 19   | 5610.281  | 49.5   | 295.278 | 878.631  | <0.001   |
| Treatment (SN) | 9    | 3270.483  | 28.9   | 363.387 | 1081.296 | <0.001   |
| Variety (V)    | 19   | 341.822   | 3.0    | 17.991  | 53.533   | <0.001   |
| Y×SN           | 171  | 1308.077  | 11.5   | 7.650   | 22.762   | <0.001   |
| Y×V            | 96   | 425.154   | 3.8    | 4.429   | 13.178   | <0.001   |
| SN×V           | 171  | 80.484    | 0.7    | 0.471   | 1.401    | <0.001   |
| Y×SN×V         | 864  | 269.425   | 2.4    | 0.312   | 0.928    | 0.918    |
| Error          | 4047 | 1360.060  | -      | 0.336   | -        | -        |
| Total          | 5399 | 12689.588 | -      | -       | -        | -        |

\* d.f. – Degrees of freedom, SS – Sum of squares, MS – Mean squares, F – variance ratio (F-test), *p* – Probability value corresponding to a variance ratio.
